# Supplementary material
Source: Elsevier journal article supplement (https://comptes-rendus.academie-sciences.fr/chimie/article/10.1016/j.crci.2012.04.010/file/attach/mmc2.pdf)
Supplement: mmc2 [file mmc2.pdf]

Table 3. The Cartesian coordinates for the optimized [B3LYP/6-311+G(2d,2p)] structure of  $\text{H}_{17}\text{O}_8^+$ .

| Atom | X      | Y      | Z      |
|------|--------|--------|--------|
| O1   | -1.278 | -1.741 | -0.729 |
| H1a  | -0.839 | -1.10  | -1.429 |
| H1b  | -1.785 | -2.425 | -1.179 |
| O2   | 0.060  | -0.013 | 2.115  |
| H2a  | 0.089  | -0.018 | 3.078  |
| O3   | 0.884  | -1.914 | 0.783  |
| H3a  | 0.558  | -1.152 | 1.485  |
| H3b  | 0.082  | -2.107 | 0.213  |
| H3c  | 1.535  | -1.451 | 0.177  |
| O4   | -2.062 | 0.204  | 0.873  |
| H4a  | -1.213 | 0.117  | 1.536  |
| H4b  | -1.853 | 0.987  | 0.281  |
| H4c  | -2.012 | -0.601 | 0.276  |
| O5   | -0.906 | 1.964  | -0.719 |
| H5a  | -0.601 | 1.253  | -1.422 |
| H5b  | -1.267 | 2.737  | -1.166 |
| O6   | 1.245  | 1.696  | 0.794  |
| H6a  | 1.792  | 1.118  | 0.183  |
| H6b  | 0.497  | 2.049  | 0.226  |
| H6c  | 0.774  | 1.009  | 1.490  |
| O7   | -0.057 | 0.011  | -2.048 |
| H7a  | -0.085 | 0.017  | -3.008 |
| O8   | 2.120  | -0.209 | -0.814 |
| H8a  | 1.323  | -0.129 | -1.483 |
| H8b  | 2.949  | -0.291 | -1.298 |
